# Supplementary material for: Shear Stress, Energy Losses, and Costs: A Resolved Dilemma of Pulsatile Cardiac Assist Devices
Source: Biomed Res Int. 2014 Jan 8;2014:651769. doi: 10.1155/2014/651769 (PMC3913384; doi:10.1155/2014/651769)
Supplement: Supplementary file 1 — 1st Movie "Pulsatile Tube tested in vitro and in vivo": first part of the movie (in vitro study) shows the pulsatile tube integrated the arterial perfusion line of a mock cardiopulmonary bypass circuit (Circuit I). The middle part of the movie shows the arterial pressure curve obtained by the tube connected as LVAD on an arrested heart. End of the movie shows the tube connected to conventional roller pump as LVAD. 2nd Movie: shows a control group piglet assisted with a conventional LVAD using a continuous flow centrifugal pump. The dark infracted zone was present after ≥ 1 h of assistance. 3rd Movie: shows the pulsatile tube tested as CAD per se (without to be connected to a perfusion pump). There were macroscopic clearance of the infarcted zone and improvement of myocardial contractility, to be followed by severe vasodilation occurred after 5 minutes of pulsations, most probably due to massive release of endothelial mediators. [file 651769.f1.zip]

Archive with 4 entries (3 files):
- mat.651769.v1/
- mat.651769.v1/control Centrifugal pump 2.m4v
- mat.651769.v1/Pulsatile tube as a main LVAD.m4v
- mat.651769.v1/Pulsatile Tube tested in vitro & in vivo.m4v
